# Supplementary material for: Cobalt-based metal–organic framework for desulfurization of thiophene as a model fuel
Source: Royal Society of Chemistry journal article supplement (doi:10.1039/d3se01140b), 2024-01-01
Supplement: d3se01140b1.pdf [file d3se01140b1.pdf]

Electronic Supporting Information

## **Cobalt-based Metal-Organic Framework for Desulfurization of Thiophene as a Model Fuel.**

**M. Christina Nilavu, T. Leelasree , Himanshu Aggarwal\*, N. Rajesh\***

*Department of Chemistry, Birla Institute of Technology and Science-Pilani, Hyderabad Campus, Jawahar Nagar, Hyderabad 500078, India.*

### **Material and Methods**

Thiophene was procured from Avra chemical, Iso-octane solvent was obtained from SRL (Sisco Research Laboratories, India) Cobalt Nitrate hexahydrate  $[\text{Co}(\text{NO}_3)_2 \cdot 6\text{H}_2\text{O}]$  was purchased from SRL, biphenyl-4,4'-dicarboxylic acid (bpdc) and 4,4'-bipyridine (bpy) were purchased from TCI chemicals.

The thiophene quantification was analyzed using Jasco-V650 UV-vis spectrophotometer at 230 nm for thiophene with 10 mm path length quartz cells. Functional groups analysis was performed using Attenuated total reflectance (ATR) Alpha II spectrometer, a compact FT-IR spectrometer with a room temperature DTGS1 detector. The crystal planes and XRD pattern of the MOF structure were studied using Rigaku Ultima-IV X-Ray diffractometer with  $\text{Cu-K}\alpha$  radiation (1.5405 Å) over  $2\theta$  range  $5^\circ$  and  $40^\circ$ . The surface morphology and elemental composition of the MOF were confirmed by SEM-EDX using FEI Apreo LoVac scanning electron microscope. XRF measurement was performed using PANalytical make Epsilon model -1. Surface characterizations, pore diameter and pore volumes of the MOF material were obtained from BET- $\text{N}_2$  isotherm analysis using Microtrac Bel (BEL SORP mini II) BET surface area analyser (degassed the samples at  $120^\circ\text{C}$  for 4 h;  $\text{N}_2$  adsorption). The elemental composition and its oxidation states were analysed from X-ray Photoelectron spectroscopy

analysis using Thermo Scientific K-Alpha (Al-K $\alpha$  monochromator) XPS instrument. The batch adsorption experimental studies were performed using Biotecnics orbital shaker.

### **Synthesis of BITSH-1 metal-organic framework.**

To synthesize BITSH-1 MOF, Co(NO<sub>3</sub>)<sub>2</sub>·6H<sub>2</sub>O of 0.1 mmol concentration was reacted with 0.1 mmol of biphenyl-4,4'-dicarboxylic acid (bpdc) and 0.05 mmol of 4,4'-bipyridine in 10mL volume of dimethylformamide (DMF) at 130 °C heating for 24 h. Followed by heating the purple-coloured MOF crystals were collected and washed thoroughly in ethanol and DMF solvent. The washed dried MOF sample was used for further characterization and application studies.<sup>17</sup>

### **Adsorptive desulfurization procedure**

Desulfurization of thiophene in isooctane was carried out in conventional stirring method using Vortex shaker. In brief, 1000 mg L<sup>-1</sup> of thiophene stock solution was prepared from which the working solutions of lower concentrations of 40 to 500 mg L<sup>-1</sup> by appropriate dilutions were prepared. For adsorptive desulfurization of thiophene using BITSH-1, 10 mL of particular concentration of thiophene in isooctane was taken, to which 20 mg of the BITSH-1 adsorbent was added and sonicated for 10 minutes in a bath sonicator. After sonication, adsorption was performed in orbital shaker for 3 h at 100 rpm.

Concentration of thiophene in isooctane before and after adsorption was quantified using UV-vis spectrophotometer. The wavelength of thiophene at specific  $\lambda_{\max}$  of 233nm corresponding to n to  $\pi^*$  transition of the lone of pair of electrons on the sulfur was used for quantification of thiophene. The equilibrium adsorption capacity was calculated as

$$q_e = (C_o - C_e) V/W \quad (1)$$

where  $C_o$  and  $C_e$  are the initial and final concentrations of thiophene,  $V$  is volume of the thiophene in Isooctane in  $L$  and  $W$  is the weight of MOF adsorbent taken in  $g$ .

### Characterization of BITSH-1

#### Field Emission Scanning Electron Microscopy (FESEM)

The morphological nature of the MOF material was studied using SEM images and the elemental compositions were confirmed by EDX spectra and elemental mapping.

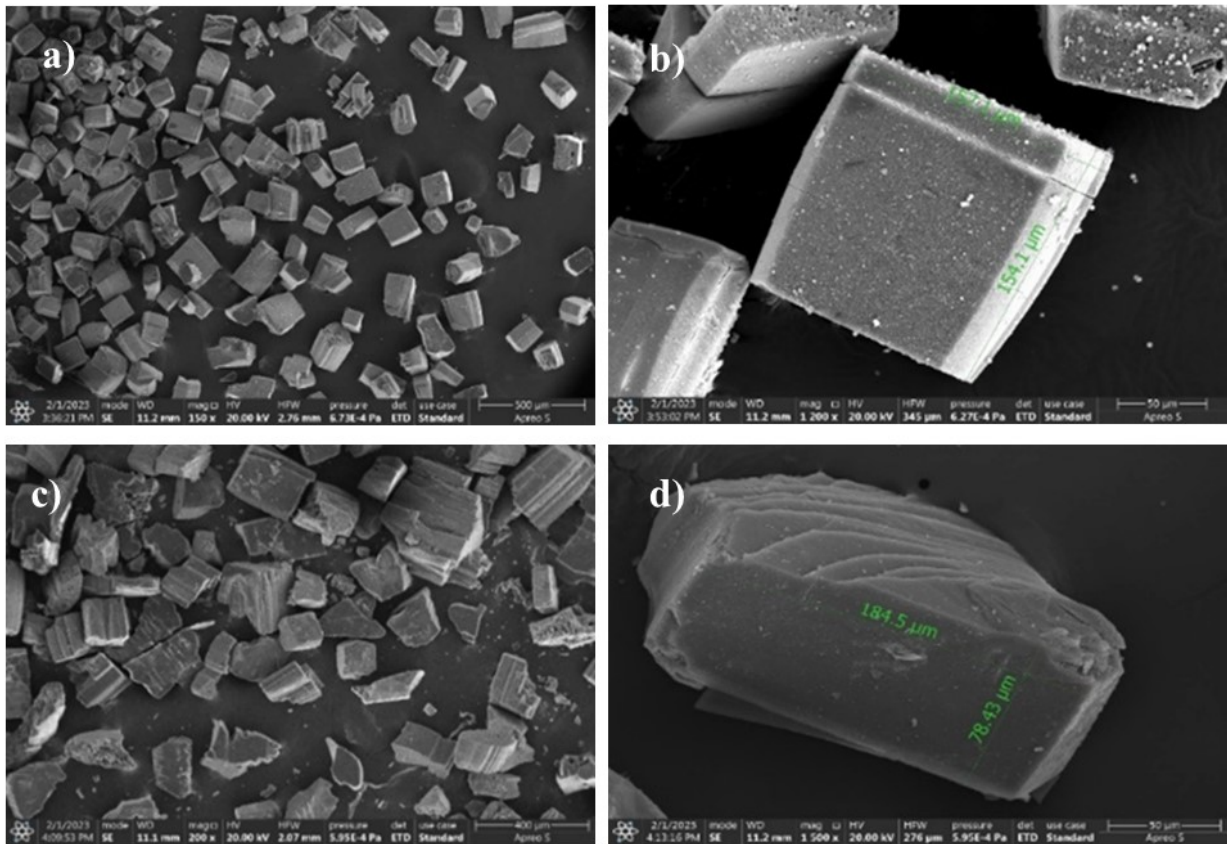

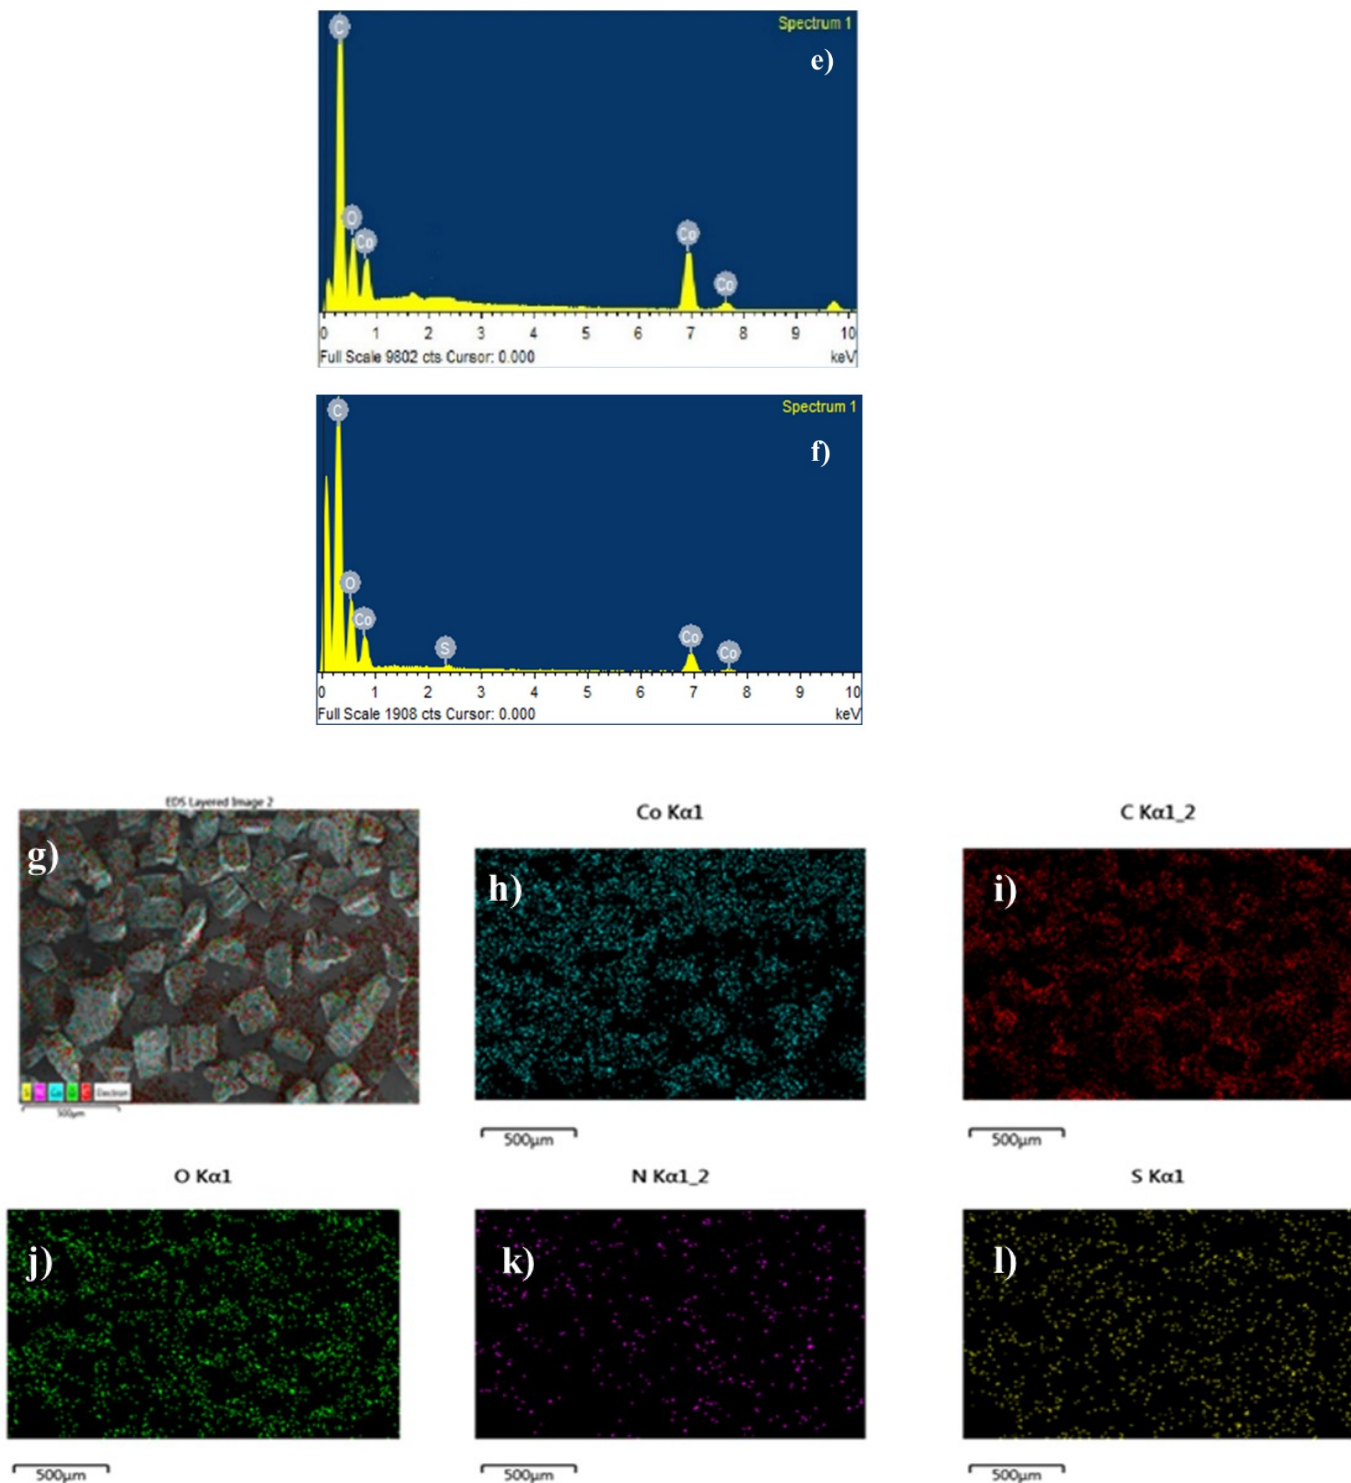

Fig. S1 a) &b SEM images of as synthesized BITSH-1, c)&d) SEM images of BITSH-1 after adsorption of thiophene, e) & f) EDX spectra of BITSH-1 before and after adsorption, g)-l) Elemental mapping of BITSH-1 with sulfur after adsorption

## Powder X-ray Diffraction (PXRD)

The crystalline nature of the BITSH-1 before and after adsorption of thiophene was characterized using PXRD patterns between  $2\theta$  of 5 to  $40^\circ$ .

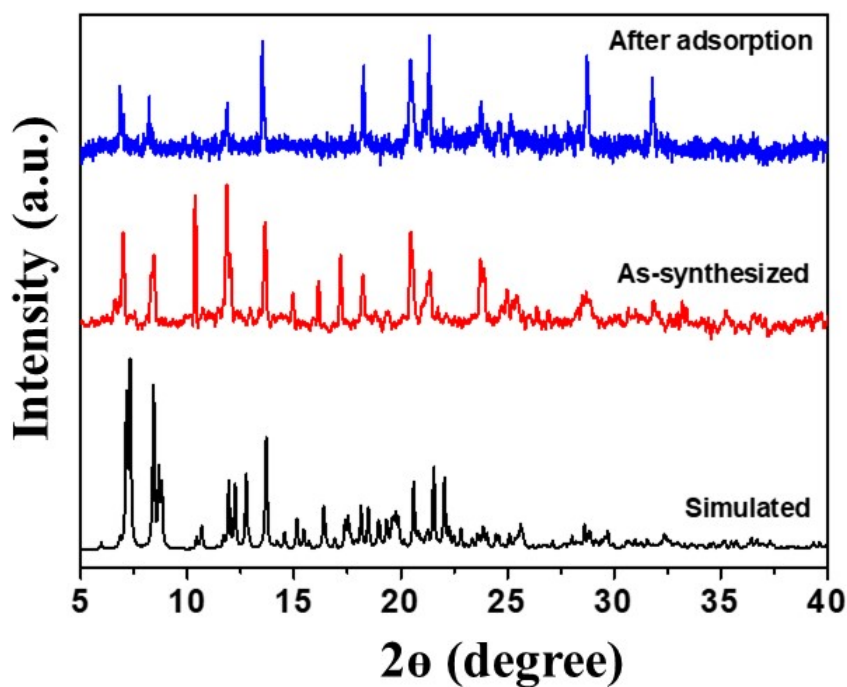

Fig. S2 XRD pattern of Simulated BITSH-1, as synthesized & after adsorption of thiophene

## Nitrogen Adsorption Experiments

Surface properties of the MOF BITSH-1 such as specific surface area, pore volume and pore diameter were characterized by BET- $N_2$  isotherm with pre-treatment conditions for  $120^\circ\text{C}$  for 4 h.

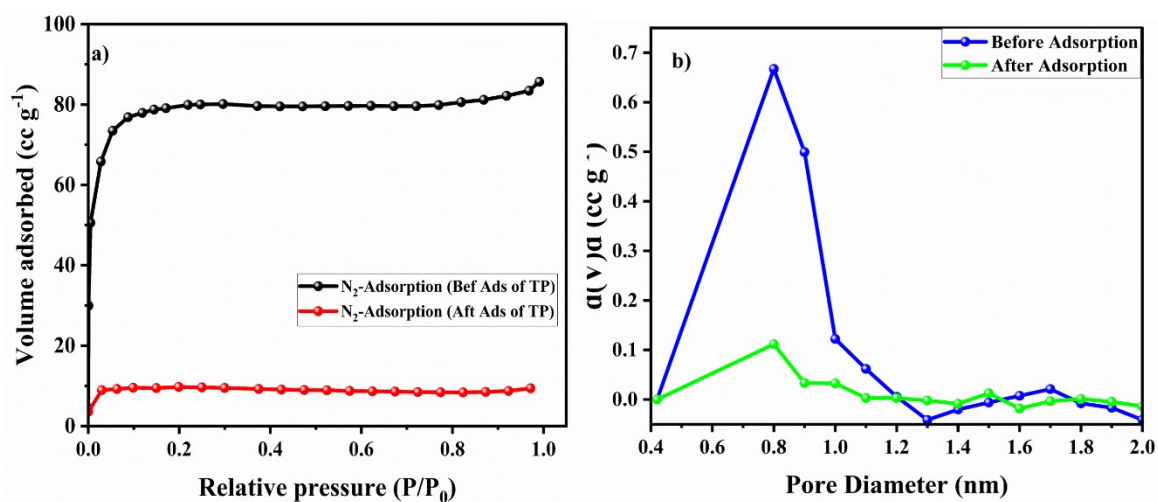

Fig. S3a) BET-N<sub>2</sub> Adsorption isotherm Plot & b) MP plot for BITSH-1 before and after adsorption of thiophene

### Thermal Analysis

Thermal analysis of the BITSH-1 MOF before and after adsorption of thiophene was performed with Thermogravimetric Analysis (TGA) and Differential Thermal Analysis (DTA) between 30 °C and 800 °C.

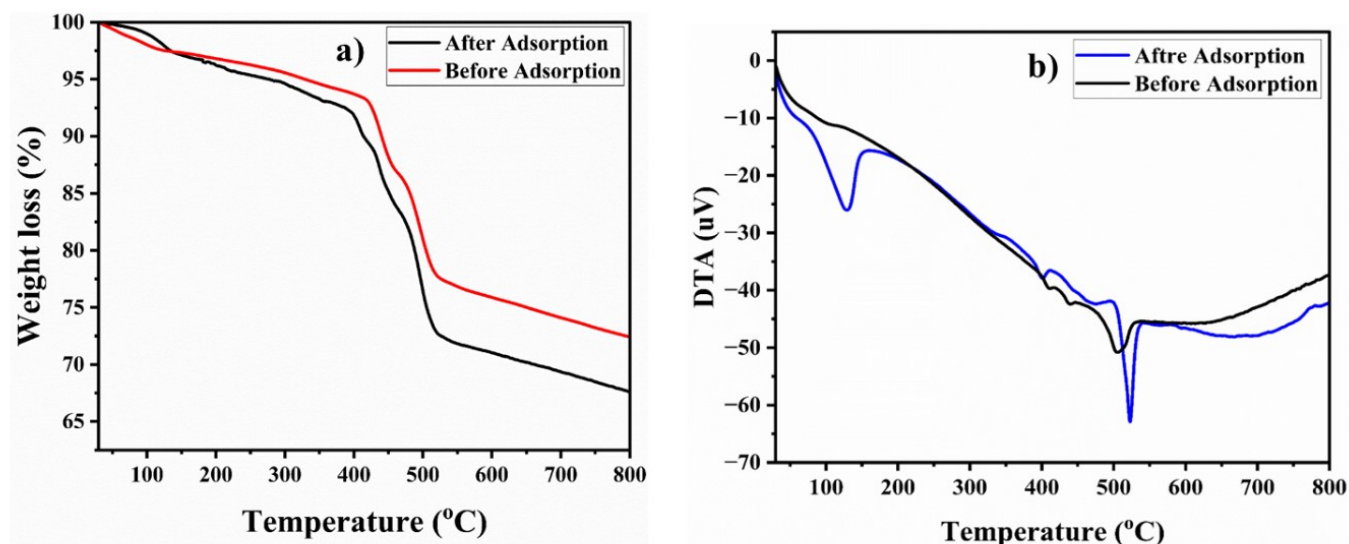

Fig. S4a) & b) TGA & DTA graph of BITSH-1 before and after adsorption

## Tables

Table S1. Theoretically calculated Isotherm parameters from experimental data

| Isotherm models | Isotherm parameters                                           | Values                 |
|-----------------|---------------------------------------------------------------|------------------------|
| Langmuir        | $q_{max}$ (mg g <sup>-1</sup> )                               | <b>95.438</b>          |
|                 | $K_L$ (L mg <sup>-1</sup> )                                   | 0.026                  |
|                 | $R^2$                                                         | 0.966                  |
| Freundlich      | $K_F$ (mg <sup>1-1/n</sup> g <sup>-1</sup> L <sup>1/n</sup> ) | 9.313                  |
|                 | $n$                                                           | 2.338                  |
|                 | $R^2$                                                         | 0.954                  |
| Temkin          | $b_T$ (J mol <sup>-1</sup> )                                  | 117.420                |
|                 | $K_T$ (L g <sup>-1</sup> )                                    | 1.835x10 <sup>-1</sup> |
|                 | $R^2$                                                         | 0.881                  |

Table S2. Theoretically obtained kinetics Parameters for adsorption of thiophene on BITSH-1

| Kinetics models     | Parameters                                    | Values |
|---------------------|-----------------------------------------------|--------|
| pseudo-first order  | $k_1$ (min <sup>-1</sup> )                    | 0.031  |
|                     | $q_{e1}$ (mg g <sup>-1</sup> )                | 16.541 |
|                     | $R^2$                                         | 0.964  |
| pseudo-second order | $k_2$ (g mg <sup>-1</sup> min <sup>-1</sup> ) | 0.099  |
|                     | $q_{e2}$ (mg g <sup>-1</sup> )                | 19.998 |
|                     | $R^2$                                         | 0.995  |

|                          |                                                   |        |
|--------------------------|---------------------------------------------------|--------|
| Intra-particle diffusion | $C_1$ (mg g <sup>-1</sup> )                       | -0.985 |
|                          | $K_{i1}$ (mg g <sup>-1</sup> min <sup>1/2</sup> ) | -1.834 |
|                          | $R^2$                                             | 0.999  |
|                          | $C_2$ (mg g <sup>-1</sup> )                       | 4.261  |
|                          | $K_{i2}$ (mg g <sup>-1</sup> min <sup>1/2</sup> ) | 1.020  |
|                          | $R^2$                                             | 0.960  |
|                          | $C_3$ (mg g <sup>-1</sup> )                       | 9.294  |
|                          | $K_{i3}$ (mg g <sup>-1</sup> min <sup>1/2</sup> ) | 0.665  |
|                          | $R^2$                                             | 0.919  |

Table S3.

Theoretically calculated thermodynamic parameters for adsorption of thiophene on BITSH-1

| Temperature<br>(Kelvin) | $\Delta G^\circ$<br>(kJ mol <sup>-1</sup> ) | $\Delta H^\circ$<br>(kJ mol <sup>-1</sup> ) | $\Delta S^\circ$<br>(kJ mol <sup>-1</sup> K <sup>-1</sup> ) | $R^2$  |
|-------------------------|---------------------------------------------|---------------------------------------------|-------------------------------------------------------------|--------|
| 298                     | -6.505                                      | -88.004                                     | -0.2762                                                     | 0.9813 |
| 308                     | -1.254                                      |                                             |                                                             |        |
| 318                     | 0.318                                       |                                             |                                                             |        |
| 328                     | 1.748                                       |                                             |                                                             |        |

### Single Crystal X-ray diffraction studies

The single crystal data was collected using a good quality single crystal of the MOF after exposure to thiophene/iso-octane solution. The data was collected at 135 K and the structure was solved using Olex2 software and refined using Olex2 function. The host framework does not show any disorder and the thermal parameters are good. The guest molecule, thiophene, on the other hand shows high thermal parameter values owing to the displacement of the thiophene molecules in the MOF channels. One of the thiophene molecules could be modelled with certainty and another thiophene molecule with a lower occupancy (~0.70) was squeezed using the mask function of Olex2 software.



Table S4. Single crystal data for BITSH-1-T structure containing thiophene inside the MOF pores.

|                                             |                                                                                  |
|---------------------------------------------|----------------------------------------------------------------------------------|
| Identification code                         | BITSH-1-T                                                                        |
| Empirical formula                           | C <sub>60</sub> H <sub>40</sub> Co <sub>3</sub> N <sub>2</sub> O <sub>12</sub> S |
| Formula weight                              | 1189.858                                                                         |
| Temperature/K                               | 135                                                                              |
| Crystal system                              | orthorhombic                                                                     |
| Space group                                 | Pbcn                                                                             |
| a/Å                                         | 13.8970(2)                                                                       |
| b/Å                                         | 26.1099(4)                                                                       |
| c/Å                                         | 18.0592(3)                                                                       |
| α/°                                         | 90                                                                               |
| β/°                                         | 90                                                                               |
| γ/°                                         | 90                                                                               |
| Volume/Å <sup>3</sup>                       | 6552.77(18)                                                                      |
| Z                                           | 4                                                                                |
| ρ <sub>calc</sub> /g/cm <sup>3</sup>        | 1.206                                                                            |
| μ/mm <sup>-1</sup>                          | 6.629                                                                            |
| F(000)                                      | 2410.9                                                                           |
| Crystal size/mm <sup>3</sup>                | 0.2 × 0.1 × 0.05                                                                 |
| Radiation                                   | Cu Kα (λ = 1.54184)                                                              |
| 2θ range for data collection/°              | 8.36 to 159.7                                                                    |
| Index ranges                                | -13 ≤ h ≤ 17,<br>-33 ≤ k ≤ 32,<br>-13 ≤ l ≤ 22                                   |
| Reflections collected                       | 27818                                                                            |
| Independent reflections                     | 7034 [R <sub>int</sub> = 0.0354, R <sub>sigma</sub> = 0.0334]                    |
| Data/restraints/parameters                  | 7034/29/332                                                                      |
| Goodness-of-fit on F <sup>2</sup>           | 1.010                                                                            |
| Final R indexes [I ≥ 2σ (I)]                | R <sub>1</sub> = 0.0622, wR <sub>2</sub> = 0.1827                                |
| Final R indexes [all data]                  | R <sub>1</sub> = 0.0677, wR <sub>2</sub> = 0.1884                                |
| Largest diff. peak/hole / e Å <sup>-3</sup> | 1.30/-0.95                                                                       |
| CCDC number                                 | 2289319                                                                          |

The interactions between the host-guest molecules is shown below and the various distances of interaction and provided in table S5.

Table S5. Distances for the interactions of the thiophene molecule with BPDC and BPY linkers.

| Interactions | Atoms      | Distance (Å) |
|--------------|------------|--------------|
| CH···O       | H30 and O4 | 2.91         |
| CH···O       | H30 and O2 | 3.01         |

|         |            |      |
|---------|------------|------|
| CH...O  | H27 and O2 | 2.94 |
| CH...HC | H27 and H3 | 2.80 |
| CH...S  | H26 and S1 | 3.25 |
